# Supplementary material
Source: Elsevier journal article supplement (https://hal-univ-rennes1.archives-ouvertes.fr/hal-01381135/file/mmc2.zip)

# checkCIF/PLATON report

Structure factors have been supplied for datablock(s) br839

THIS REPORT IS FOR GUIDANCE ONLY. IF USED AS PART OF A REVIEW PROCEDURE FOR PUBLICATION, IT SHOULD NOT REPLACE THE EXPERTISE OF AN EXPERIENCED CRYSTALLOGRAPHIC REFEREE.

No syntax errors found.      CIF dictionary      Interpreting this report

## Datablock: br839

---

Bond precision:    C-C = 0.0199 Å                      Wavelength=0.71073

Cell:                      a=19.647(3)              b=34.033(6)              c=37.872(5)  
                            alpha=90              beta=90              gamma=90  
Temperature:              150 K

|                | Calculated                   | Reported                     |
|----------------|------------------------------|------------------------------|
| Volume         | 25323(7)                     | 25323(7)                     |
| Space group    | P b c a                      | P b c a                      |
| Hall group     | -P 2ac 2ab                   | -P 2ac 2ab                   |
| Moiety formula | C115 H105 Cu3 P8 Ru, 2(B F4) | C115 H105 Cu3 P8 Ru, 2(B F4) |
| Sum formula    | C115 H105 B2 Cu3 F8 P8 Ru    | C115 H105 B2 Cu3 F8 P8 Ru    |
| Mr             | 2200.10                      | 2200.05                      |
| Dx,g cm-3      | 1.154                        | 1.154                        |
| Z              | 8                            | 8                            |
| Mu (mm-1)      | 0.767                        | 0.767                        |
| F000           | 9024.0                       | 9024.0                       |
| F000'          | 9031.16                      |                              |
| h,k,lmax       | 23,40,45                     | 23,40,44                     |
| Nref           | 22316                        | 22316                        |
| Tmin,Tmax      | 0.885,0.948                  | 0.440,0.780                  |
| Tmin'          | 0.885                        |                              |

Correction method= # Reported T Limits: Tmin=0.440 Tmax=0.780  
AbsCorr = MULTI-SCAN

Data completeness= 1.000                      Theta(max)= 25.000

R(reflections)= 0.1352( 14557)              wR2(reflections)= 0.3442( 22316)

S = 1.060                      Npar= 1239

---

The following ALERTS were generated. Each ALERT has the format

**test-name\_ALERT\_alert-type\_alert-level.**

Click on the hyperlinks for more details of the test.

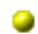

### Alert level C

|                   |                                                 |              |
|-------------------|-------------------------------------------------|--------------|
| RFACG01_ALERT_3_C | The value of the R factor is > 0.10             |              |
|                   | R factor given 0.135                            |              |
| RFACR01_ALERT_3_C | The value of the weighted R factor is > 0.25    |              |
|                   | Weighted R factor given 0.344                   |              |
| RINTA01_ALERT_3_C | The value of Rint is greater than 0.12          |              |
|                   | Rint given 0.140                                |              |
| PLAT020_ALERT_3_C | The value of Rint is greater than 0.12 .....    | 0.140 Report |
| PLAT082_ALERT_2_C | High R1 Value .....                             | 0.14 Report  |
| PLAT084_ALERT_3_C | High wR2 Value (i.e. > 0.25) .....              | 0.34 Report  |
| PLAT220_ALERT_2_C | Large Non-Solvent C Ueq(max)/Ueq(min) Range     | 5.2 Ratio    |
| PLAT234_ALERT_4_C | Large Hirshfeld Difference P3 -- C30 ..         | 0.17 Ang.    |
| PLAT234_ALERT_4_C | Large Hirshfeld Difference P4 -- C30 ..         | 0.17 Ang.    |
| PLAT234_ALERT_4_C | Large Hirshfeld Difference P4 -- C421 ..        | 0.20 Ang.    |
| PLAT234_ALERT_4_C | Large Hirshfeld Difference C102 -- C103 ..      | 0.16 Ang.    |
| PLAT234_ALERT_4_C | Large Hirshfeld Difference C213 -- C214 ..      | 0.20 Ang.    |
| PLAT234_ALERT_4_C | Large Hirshfeld Difference C311 -- C312 ..      | 0.18 Ang.    |
| PLAT234_ALERT_4_C | Large Hirshfeld Difference C311 -- C316 ..      | 0.16 Ang.    |
| PLAT234_ALERT_4_C | Large Hirshfeld Difference C314 -- C315 ..      | 0.20 Ang.    |
| PLAT234_ALERT_4_C | Large Hirshfeld Difference C315 -- C316 ..      | 0.23 Ang.    |
| PLAT234_ALERT_4_C | Large Hirshfeld Difference C321 -- C322 ..      | 0.21 Ang.    |
| PLAT234_ALERT_4_C | Large Hirshfeld Difference C412 -- C413 ..      | 0.19 Ang.    |
| PLAT234_ALERT_4_C | Large Hirshfeld Difference C515 -- C516 ..      | 0.16 Ang.    |
| PLAT234_ALERT_4_C | Large Hirshfeld Difference C611 -- C616 ..      | 0.16 Ang.    |
| PLAT234_ALERT_4_C | Large Hirshfeld Difference C621 -- C622 ..      | 0.17 Ang.    |
| PLAT234_ALERT_4_C | Large Hirshfeld Difference C622 -- C623 ..      | 0.17 Ang.    |
| PLAT234_ALERT_4_C | Large Hirshfeld Difference C815 -- C816 ..      | 0.18 Ang.    |
| PLAT234_ALERT_4_C | Large Hirshfeld Difference C825 -- C826 ..      | 0.18 Ang.    |
| PLAT241_ALERT_2_C | High Ueq as Compared to Neighbors for .....     | C114 Check   |
| PLAT241_ALERT_2_C | High Ueq as Compared to Neighbors for .....     | C313 Check   |
| PLAT241_ALERT_2_C | High Ueq as Compared to Neighbors for .....     | C315 Check   |
| PLAT241_ALERT_2_C | High Ueq as Compared to Neighbors for .....     | C324 Check   |
| PLAT241_ALERT_2_C | High Ueq as Compared to Neighbors for .....     | C616 Check   |
| PLAT241_ALERT_2_C | High Ueq as Compared to Neighbors for .....     | C825 Check   |
| PLAT242_ALERT_2_C | Low Ueq as Compared to Neighbors for .....      | C311 Check   |
| PLAT242_ALERT_2_C | Low Ueq as Compared to Neighbors for .....      | C314 Check   |
| PLAT242_ALERT_2_C | Low Ueq as Compared to Neighbors for .....      | C611 Check   |
| PLAT242_ALERT_2_C | Low Ueq as Compared to Neighbors for .....      | C614 Check   |
| PLAT332_ALERT_2_C | Large Phenyl C-C Range C411 -C416               | 0.21 Ang.    |
| PLAT342_ALERT_3_C | Low Bond Precision on C-C Bonds .....           | 0.0199 Ang.  |
| PLAT373_ALERT_2_C | Long C(sp)-C(sp) Bond C2 - C3 ...               | 1.36 Ang.    |
| PLAT906_ALERT_3_C | Large K value in the Analysis of Variance ..... | 15.203 Check |
| PLAT906_ALERT_3_C | Large K value in the Analysis of Variance ..... | 3.779 Check  |
| PLAT906_ALERT_3_C | Large K value in the Analysis of Variance ..... | 2.119 Check  |

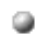

### Alert level G

|                   |                                                    |              |
|-------------------|----------------------------------------------------|--------------|
| PLAT072_ALERT_2_G | SHELXL First Parameter in WGHT Unusually Large.    | 0.13 Report  |
| PLAT083_ALERT_2_G | SHELXL Second Parameter in WGHT Unusually Large.   | 463.93 Why ? |
| PLAT244_ALERT_4_G | Low 'Solvent' Ueq as Compared to Neighbors of      | B1 Check     |
| PLAT343_ALERT_2_G | Unusual sp? Angle Range in Main Residue for        | C4 Check     |
| PLAT606_ALERT_4_G | VERY LARGE Solvent Accessible VOID(S) in Structure | ! Info       |

**Author Response: Attempts to locate solvent molecules resulted in several molecules with huge U(eq) values and with R~.14. Use of the program Squeeze resulted in much lower residuals.**

|                   |                                                 |     |              |
|-------------------|-------------------------------------------------|-----|--------------|
| PLAT860_ALERT_3_G | Number of Least-Squares Restraints .....        | 598 | Note         |
| PLAT869_ALERT_4_G | ALERTS Related to the use of SQUEEZE Suppressed | !   | Info         |
| PLAT909_ALERT_3_G | Percentage of Observed Data at Theta(Max) still | 33  | %            |
| PLAT961_ALERT_5_G | Dataset Contains no Negative Intensities .....  |     | Please Check |

---

|    |                      |                                                              |
|----|----------------------|--------------------------------------------------------------|
| 0  | <b>ALERT level A</b> | = Most likely a serious problem - resolve or explain         |
| 0  | <b>ALERT level B</b> | = A potentially serious problem, consider carefully          |
| 40 | <b>ALERT level C</b> | = Check. Ensure it is not caused by an omission or oversight |
| 9  | <b>ALERT level G</b> | = General information/check it is not something unexpected   |

  

|    |              |                                                              |
|----|--------------|--------------------------------------------------------------|
| 0  | ALERT type 1 | CIF construction/syntax error, inconsistent or missing data  |
| 17 | ALERT type 2 | Indicator that the structure model may be wrong or deficient |
| 11 | ALERT type 3 | Indicator that the structure quality may be low              |
| 20 | ALERT type 4 | Improvement, methodology, query or suggestion                |
| 1  | ALERT type 5 | Informative message, check                                   |

---

It is advisable to attempt to resolve as many as possible of the alerts in all categories. Often the minor alerts point to easily fixed oversights, errors and omissions in your CIF or refinement strategy, so attention to these fine details can be worthwhile. In order to resolve some of the more serious problems it may be necessary to carry out additional measurements or structure refinements. However, the purpose of your study may justify the reported deviations and the more serious of these should normally be commented upon in the discussion or experimental section of a paper or in the "special\_details" fields of the CIF. checkCIF was carefully designed to identify outliers and unusual parameters, but every test has its limitations and alerts that are not important in a particular case may appear. Conversely, the absence of alerts does not guarantee there are no aspects of the results needing attention. It is up to the individual to critically assess their own results and, if necessary, seek expert advice.

### **Publication of your CIF in IUCr journals**

A basic structural check has been run on your CIF. These basic checks will be run on all CIFs submitted for publication in IUCr journals (*Acta Crystallographica*, *Journal of Applied Crystallography*, *Journal of Synchrotron Radiation*); however, if you intend to submit to *Acta Crystallographica Section C* or *E*, you should make sure that full publication checks are run on the final version of your CIF prior to submission.

### **Publication of your CIF in other journals**

Please refer to the *Notes for Authors* of the relevant journal for any special instructions relating to CIF submission.

---

**PLATON version of 21/06/2015; check.def file version of 21/06/2015**

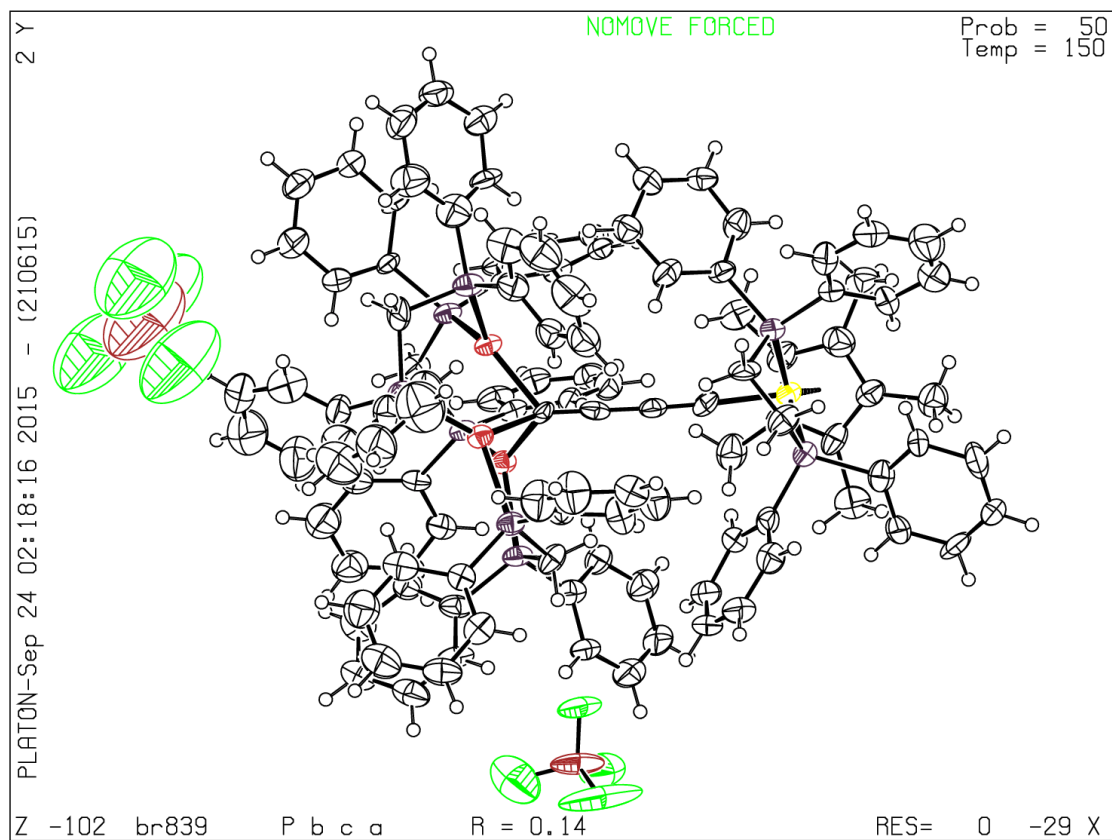

Supplement: mmc2 [file mmc2.zip]
